# Supplementary material for: Crystalloid volume versus catecholamines for management of hemorrhagic shock during esophagectomy: assessment of microcirculatory tissue oxygenation of the gastric conduit in a porcine model using hyperspectral imaging – an experimental study
Source: PubMed Central journal article supplement (PMC11486957; doi:10.1097/js9.0000000000001849), 2024-07-08

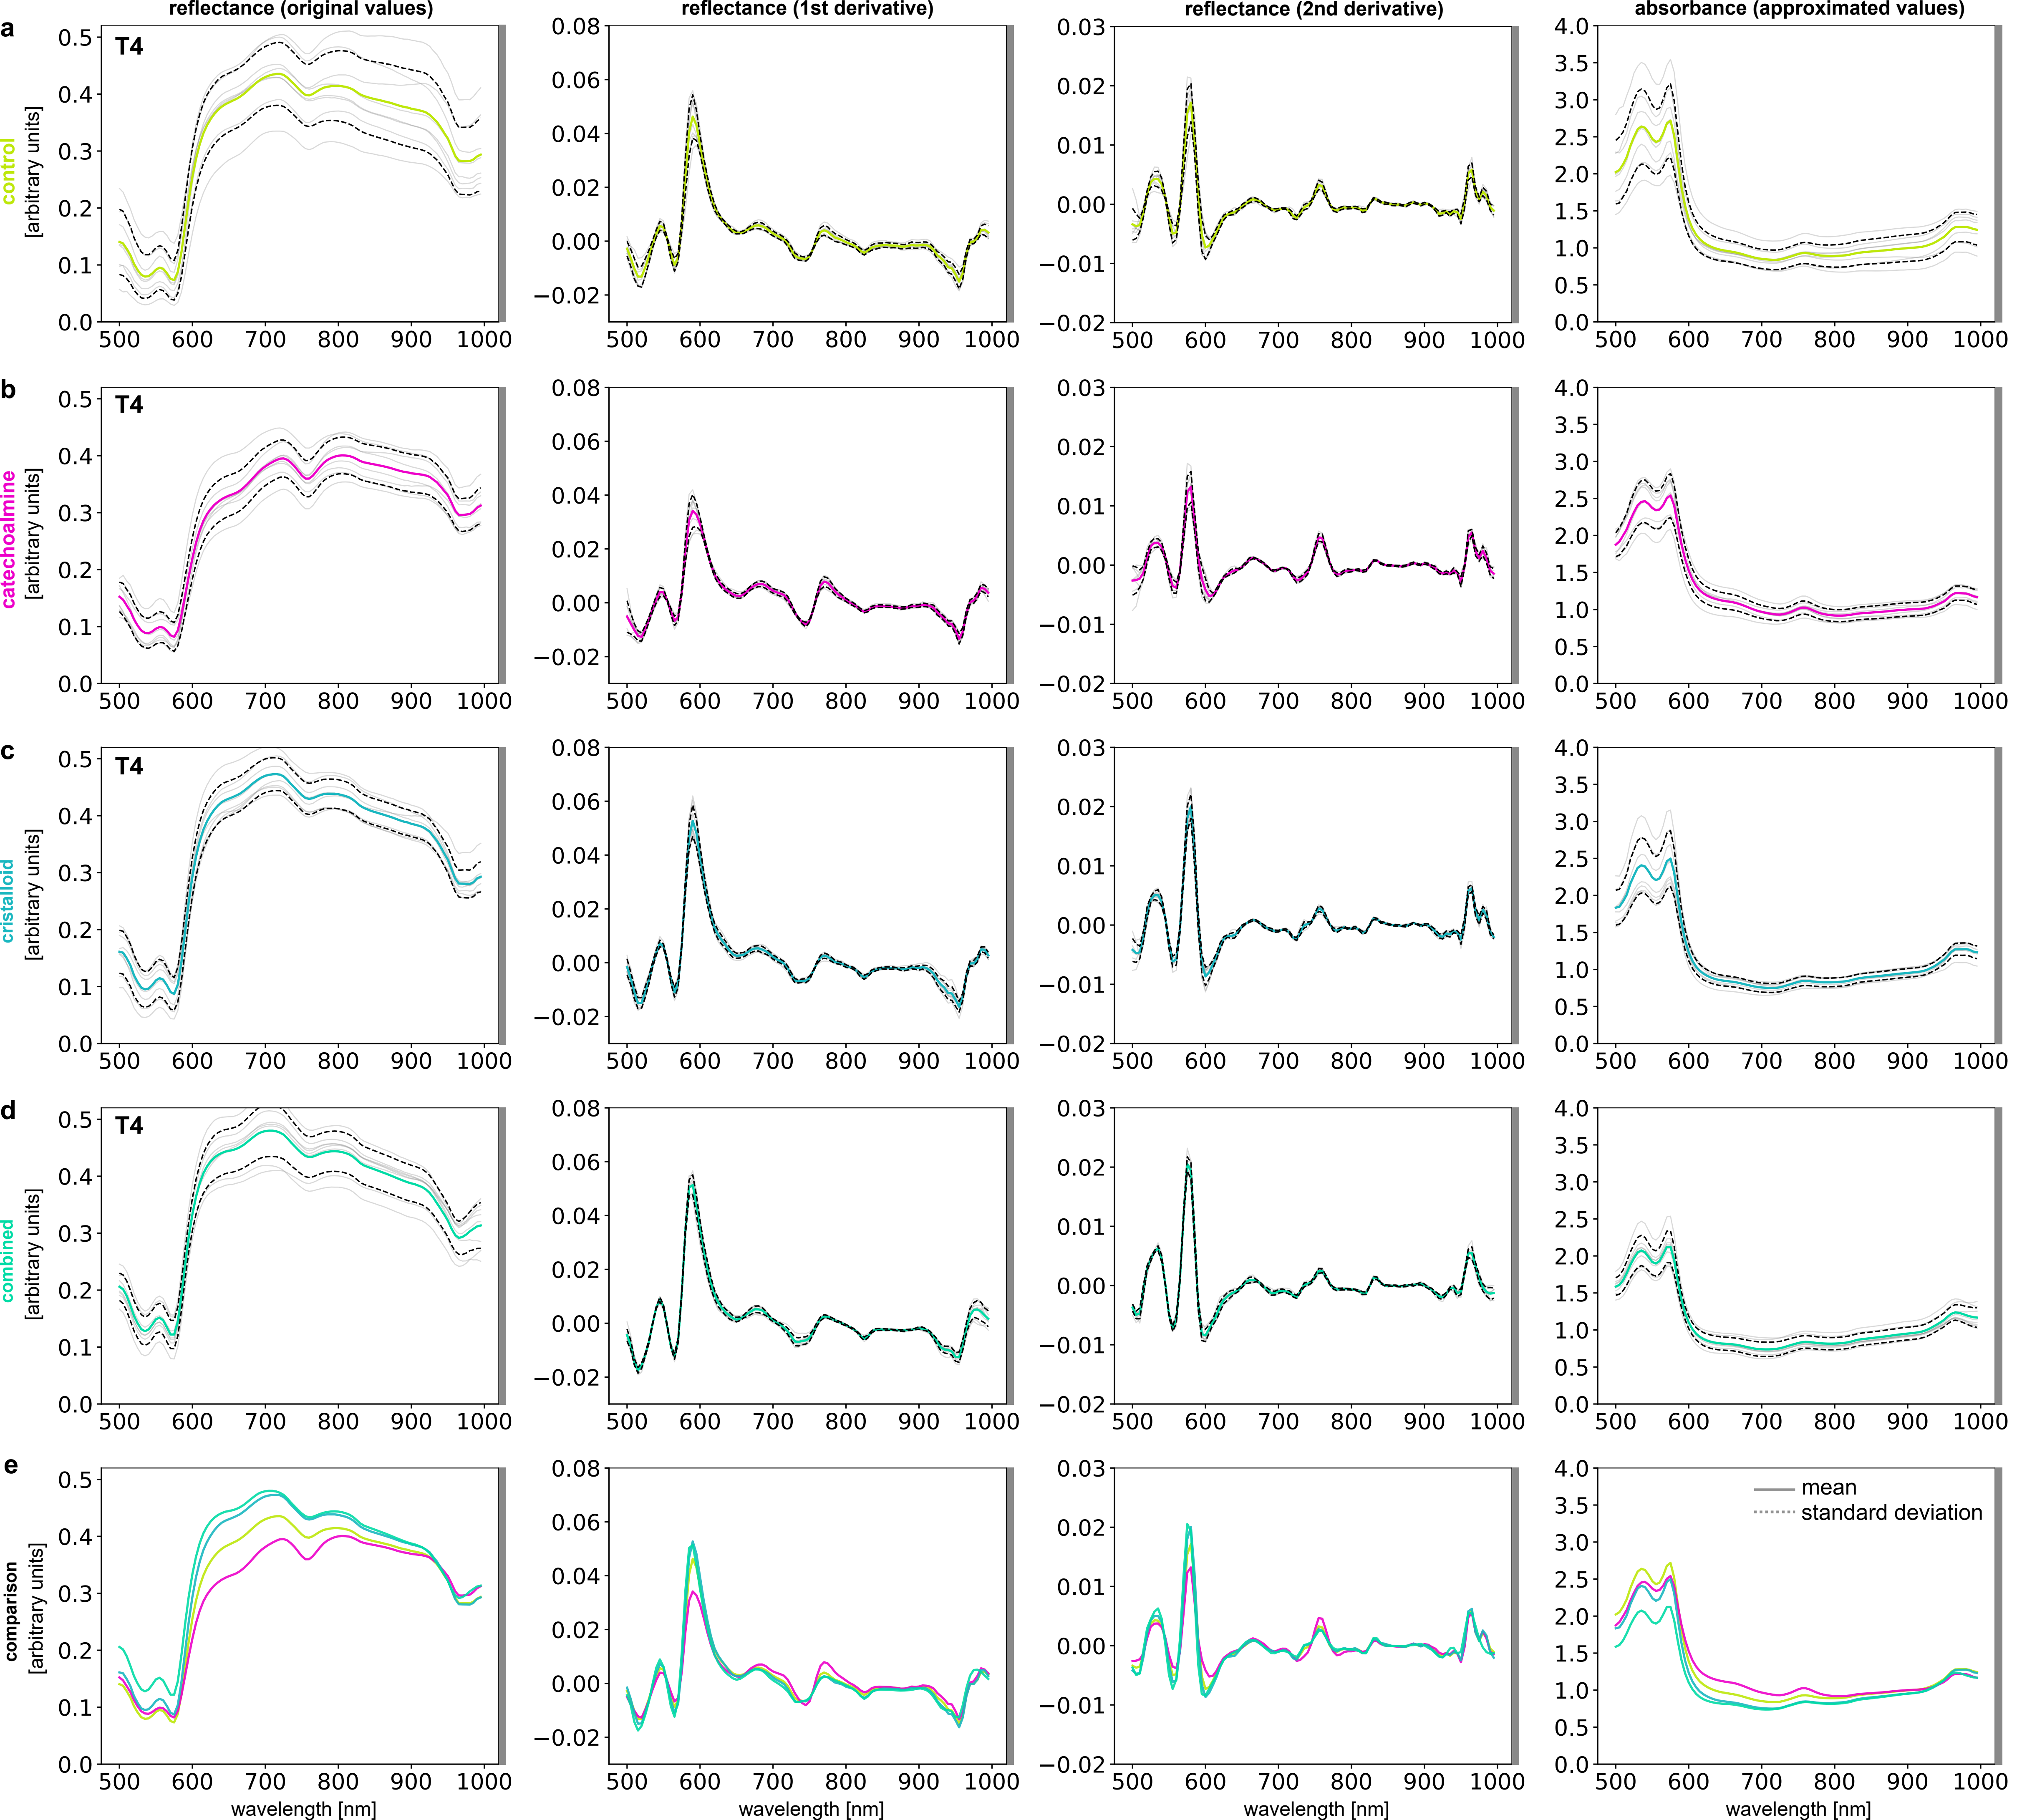

Supplement: js9-110-6558-s009.pdf [file js9-110-6558-s009.pdf]
